# Supplementary material
Source: PubMed Central journal article supplement (PMC8297533)
Supplement: jb00204-21_supp_1_seq1.pdf [file jb00204-21_supp_1_seq1.pdf]

## Supplementary Material

### Impact of FtsZ Inhibition on the Localization of the Penicillin Binding Proteins in Methicillin-Resistant *Staphylococcus aureus*

**Edgar Ferrer-González,<sup>a</sup> Hyun Huh,<sup>b</sup> Hassan M. Al-Tameemi,<sup>c</sup> Jeffrey M. Boyd,<sup>c</sup> Sang-Hyuk Lee,<sup>b,d#</sup> and Daniel S. Pilch<sup>a#</sup>**

<sup>a</sup>Department of Pharmacology, Rutgers Robert Wood Johnson Medical School, Piscataway, New Jersey, USA

<sup>b</sup>Institute for Quantitative Biomedicine, Rutgers University, Piscataway, NJ, USA

<sup>c</sup>Department of Biochemistry and Microbiology, School of Environmental and Biological Sciences, Rutgers University, New Brunswick, NJ, USA

<sup>d</sup>Department of Physics and Astronomy, Rutgers University, Piscataway, NJ, USA

#Address correspondence to Daniel S. Pilch, [pilchds@rwjms.rutgers.edu](mailto:pilchds@rwjms.rutgers.edu) or Sang-Hyuk Lee, [sl1251@physics.rutgers.edu](mailto:sl1251@physics.rutgers.edu).

Supplemental Figures and Tables:

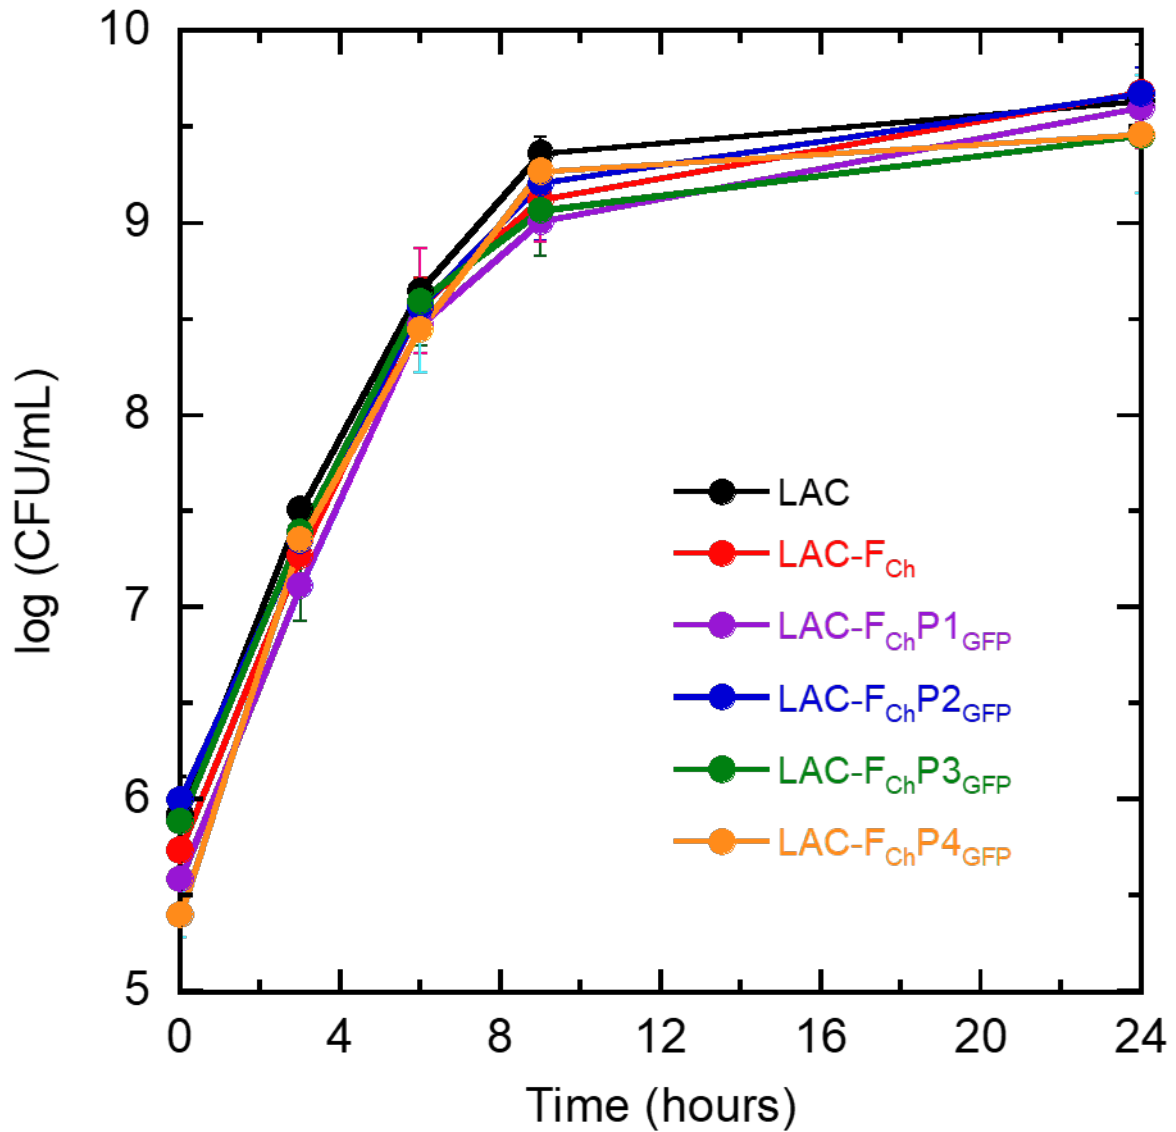

**Figure S1:** Growth curves associated with wild-type and genetically modified MRSA LAC strains.

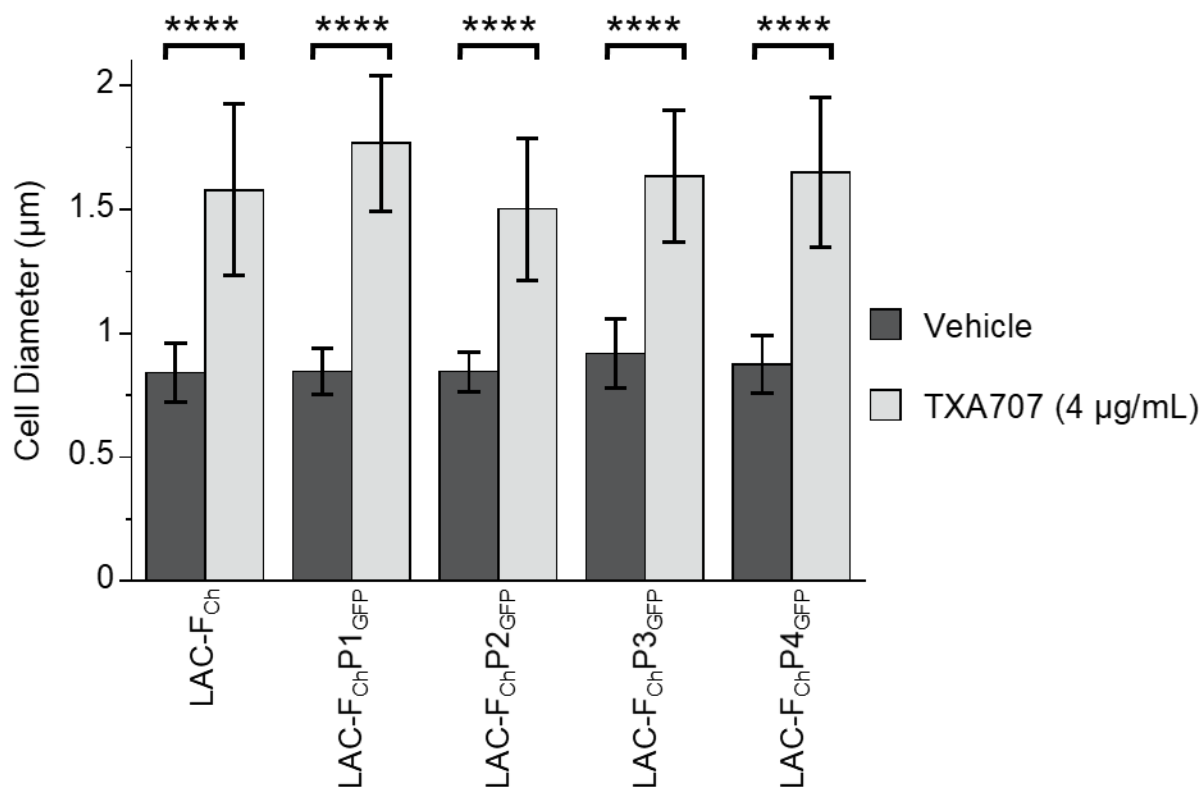

**Figure S2:** Impact of TXA707 treatment on the cell diameter of MRSA LAC cells expressing a FtsZ-mCherry fusion protein (LAC-F<sub>Ch</sub>) or both FtsZ-mCherry and an sfGFP fusion protein of PBP1, PBP2, PBP3, or PBP4 (LAC-F<sub>Ch</sub>P1<sub>GFP</sub>, LAC-F<sub>Ch</sub>P2<sub>GFP</sub>, LAC-F<sub>Ch</sub>P3<sub>GFP</sub>, and LAC-F<sub>Ch</sub>P4<sub>GFP</sub>, respectively). Cells were treated for 3 hours with vehicle (DMSO) or 4 µg/mL (4x MIC) TXA707. The bar graph shows the average diameter of both vehicle-treated cells ( $n = 536, 919, 1,071, 545, \text{ and } 300$  for LAC-F<sub>Ch</sub>, LAC-F<sub>Ch</sub>P1<sub>GFP</sub>, LAC-F<sub>Ch</sub>P2<sub>GFP</sub>, LAC-F<sub>Ch</sub>P3<sub>GFP</sub>, and LAC-F<sub>Ch</sub>P4<sub>GFP</sub>, respectively) and TXA707-treated cells ( $n = 315, 531, 368, 326, \text{ and } 326$  for LAC-F<sub>Ch</sub>, LAC-F<sub>Ch</sub>P1<sub>GFP</sub>, LAC-F<sub>Ch</sub>P2<sub>GFP</sub>, LAC-F<sub>Ch</sub>P3<sub>GFP</sub>, and LAC-F<sub>Ch</sub>P4<sub>GFP</sub>, respectively). The indicated error bars reflect the standard deviation from the mean. The statistical significance of differences in cell diameter were analyzed using a One-Way ANOVA test. \*\*\*\* reflects a  $p$ -value  $< 0.0001$ ; \*\*\* reflects a  $p$ -value in the range of  $0.0001 < p < 0.001$ ; \*\* reflects a  $p$ -value in the range of  $0.001 < p < 0.01$ ; \* reflects a  $p$ -value in the range of  $0.01 < p < 0.1$ ; n.s. denotes not significant, as reflected by a  $p$ -value  $> 0.1$ .

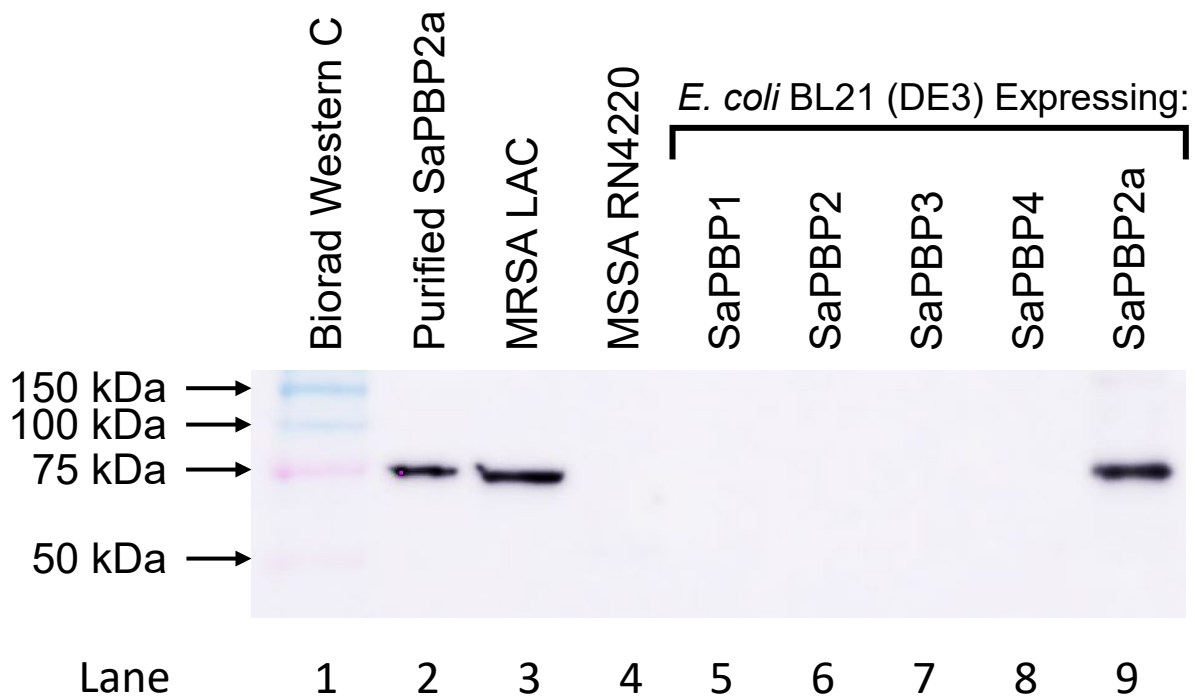

**Figure S3:** Western blot analysis of the mouse anti-MRSA monoclonal antibody (RayBiotech). Lane 2 contains 2.5 ng of purified *S. aureus* PBP2a (SaPBP2a), while lanes 3-9 contain lysates of MRSA LAC (lane 3), MSSA RN4220 (lane 4), and *E. coli* BL21 (DE3) cells (lanes 5-9). The *E. coli* cell lysates in lanes 5-9 are of strains expressing recombinant SaPBP1 (lanes 5), SaPBP2 (lane 6), SaPBP3 (lane 7), SaPBP4 (lane 8), or SaPBP2a (lane 9). All cell lysates contained 2.5  $\mu$ g total protein.

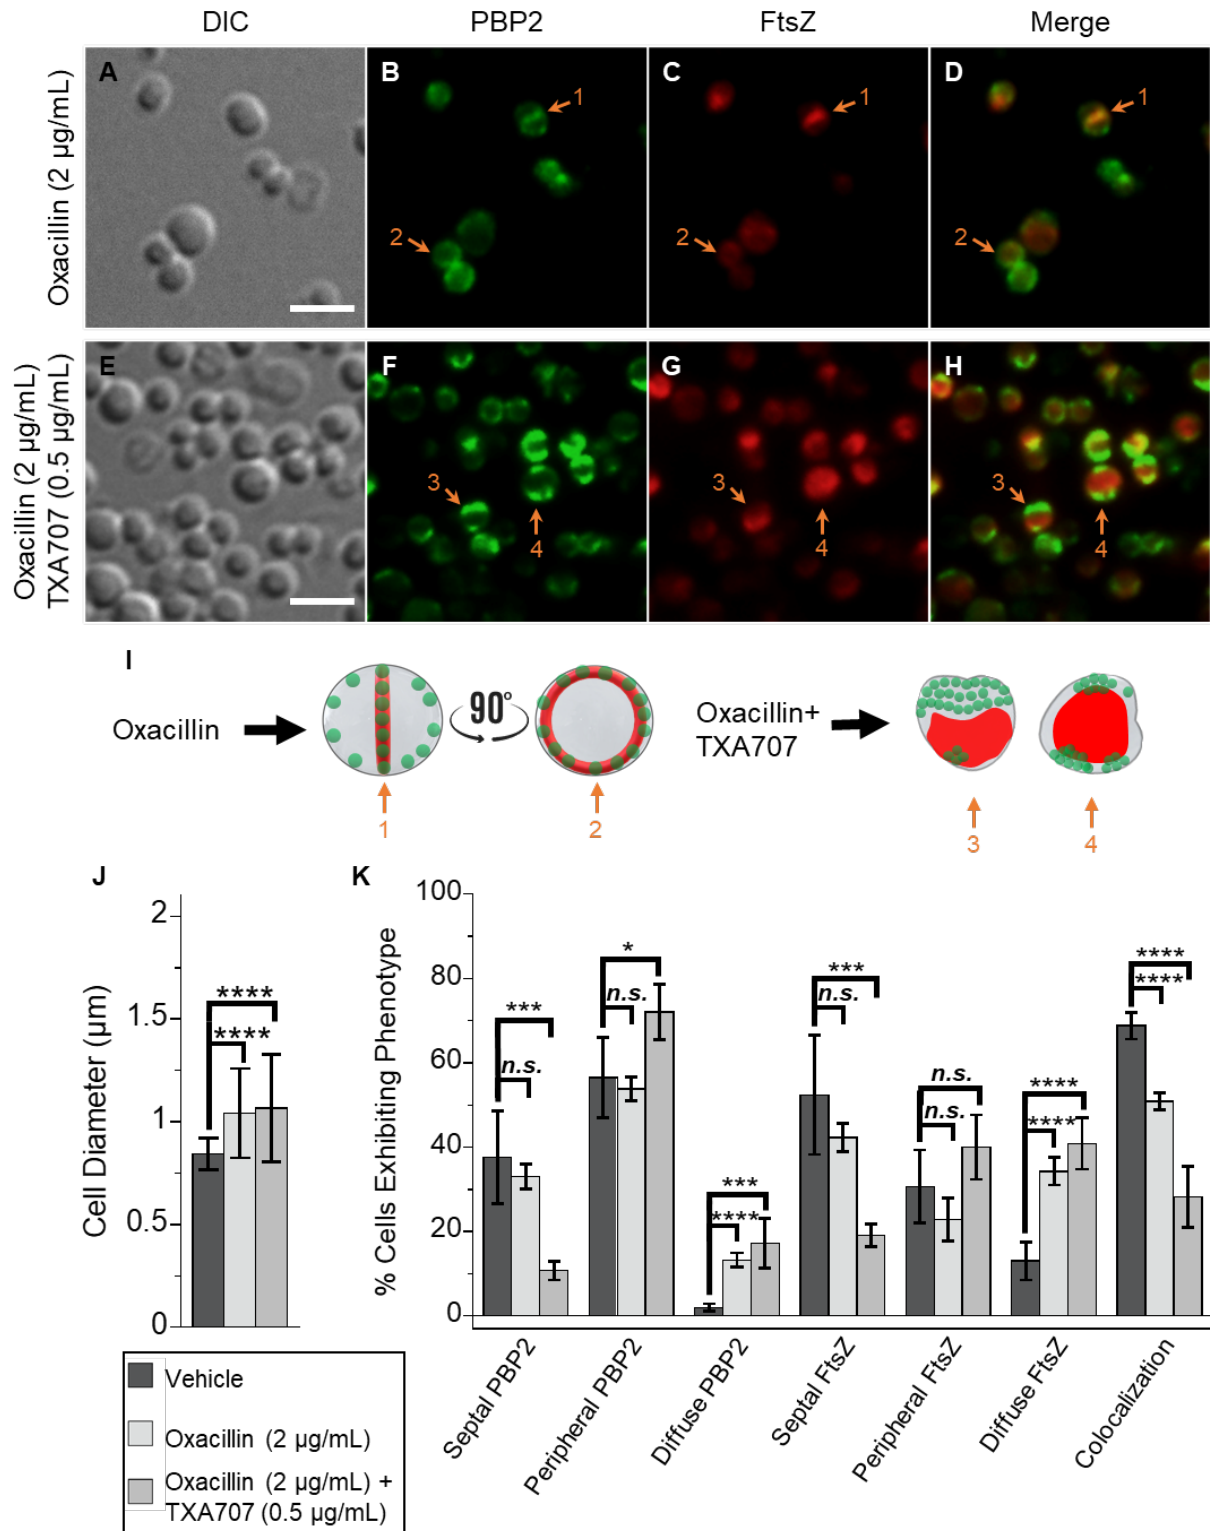

**Figure S4:** DIC and fluorescence micrographs of MRSA LAC-F<sub>Ch</sub>P2<sub>GFP</sub> cells treated for 3 hours with either 2  $\mu\text{g}/\text{mL}$  (1/32x MIC) oxacillin (A-D) or a combination of 2  $\mu\text{g}/\text{mL}$  (1/32x MIC) oxacillin and 0.5

$\mu\text{g/mL}$  (1/2x MIC) TXA707 (E-H) just prior to visualization. The localization of PBP2 (green) and FtsZ (red) is schematically depicted in panel I, with the numbered arrows in the scheme reflecting the correspondingly numbered arrows in the fluorescence micrographs. The scale bars for panels A-H represent 2  $\mu\text{m}$ . The bar graph in panel J shows the average diameter of the vehicle-treated cells ( $n = 1,071$ ), oxacillin-treated cells ( $n = 406$ ), and the cells treated with a combination of both oxacillin and TXA707 ( $n = 432$ ). The bar graph in panel K shows the prevalence (in %) of the various FtsZ and PBP2 phenotypes observed in the different treatment groups. Each percentage reflects an average of 5 different fields of view, with the number of cells in each field of view ranging from 61 to 247. In both panels J and K, the indicated error bars reflect the standard deviation from the mean. The statistical significance of differences in cell diameter, FtsZ phenotype, and PBP2 phenotype were analyzed as described in the legend to Fig. S2.

**TABLE S1** Activities of TXA707, various  $\beta$ -lactam antibiotics, and vancomycin against the wild-type and genetically modified MRSA LAC strains as well as MSSA RN4220

| Strain                                | MIC ( $\mu\text{g/mL}$ ) |           |             |            |            |            |
|---------------------------------------|--------------------------|-----------|-------------|------------|------------|------------|
|                                       | TXA707                   | Oxacillin | Ceftriaxone | Cefotaxime | Cephalexin | Vancomycin |
| Wild-Type LAC                         | 1                        | 64        | 512         | 128        | 128        | 1          |
| LAC-F <sub>Ch</sub>                   | 1                        | 64        | 256         | 128        | 128        | 1          |
| LAC-F <sub>Ch</sub> P1 <sub>GFP</sub> | 1                        | 64        | 256         | 128        | 128        | 1          |
| LAC-F <sub>Ch</sub> P2 <sub>GFP</sub> | 1                        | 64        | 512         | 128        | 128        | 1          |
| LAC-F <sub>Ch</sub> P3 <sub>GFP</sub> | 1                        | 64        | 256         | 128        | 128        | 1          |
| LAC-F <sub>Ch</sub> P4 <sub>GFP</sub> | 1                        | 64        | 256         | 64         | 128        | 1          |
| LAC-P2A <sub>Ch-1</sub>               | 1                        | 0.125     | 4           | 2          | 4          | 1          |
| LAC-P2A <sub>Ch-2</sub>               | 1                        | 0.125     | 4           | 2          | 4          | 1          |
| MSSA RN4220                           | 1                        | 0.125     | 4           | 2          | 4          | 1          |

**TABLE S2** Plasmids used in this study

| Plasmid             | Description                                | Source                      |
|---------------------|--------------------------------------------|-----------------------------|
| pJB38               | Insertless vector for allelic exchange     | J. L. Bose <sup>a</sup>     |
| pJB38-sfGFP-PBP1    | Construction of <i>sfgfp-pbpA</i> allele   | This study                  |
| pJB38-sfGFP-PBP2    | Construction of <i>sfgfp-pbpB</i> allele   | This study                  |
| pJB38-sfGFP-PBP3    | Construction of <i>sfgfp-pbpC</i> allele   | This study                  |
| pJB38-PBP4-sfGFP    | Construction of <i>pbpD-sfgfp</i> allele   | This study                  |
| pJB38-mCherry-PBP2a | Construction of <i>mCherry-mecA</i> allele | This study                  |
| pJB38-PBP2a-mCherry | Construction of <i>mecA-mCherry</i> allele | This study                  |
| pCM11               | Plasmid containing the gene for sfGFP      | A. R. Horswill <sup>b</sup> |
| pmCherry            | Plasmid containing the gene for mCherry    | Takara Bio, Inc.            |

<sup>a</sup>Reference (1)<sup>b</sup>Reference (2)



**TABLE S3** DNA fragments (P1, P2, and P3) used in the preparation of the allelic exchange vectors for each listed strain

| Strain                                | DNA Fragments                    |          |                                                             |                                      |          |                                                         |                                  |          |                        | Resulting Plasmid   |
|---------------------------------------|----------------------------------|----------|-------------------------------------------------------------|--------------------------------------|----------|---------------------------------------------------------|----------------------------------|----------|------------------------|---------------------|
|                                       | P1                               |          |                                                             | P2                                   |          |                                                         | P3                               |          |                        |                     |
|                                       | Primers <sup>a</sup>             | Template | Description                                                 | Primers <sup>a</sup>                 | Template | Description                                             | Primers <sup>a</sup>             | Template | Description            |                     |
| LAC-F <sub>Ch</sub> P1 <sub>GFP</sub> | pJB38-pbpA up-F<br>pbpA up-R     | LAC      | Upstream <i>pbpA</i>                                        | sfGFP-pbpA-F<br>sfGFP-pbpA-R         | pCM11    | sfGFP (with stop codon deleted and linker introduced)   | pbpA-F<br>pbpA-pJB38-R           | LAC      | <i>pbpA</i>            | pJB38-sfGFP-PBP1    |
| LAC-F <sub>Ch</sub> P2 <sub>GFP</sub> | pJB38-pbpB up-F<br>pbpB up-R     | LAC      | Upstream <i>pbpB</i>                                        | sfGFP-pbpB-F<br>sfGFP-pbpB-R         | pCM11    | sfGFP (with stop codon deleted and linker introduced)   | pbpB-F<br>pbpB-pJB38-R           | LAC      | <i>pbpB</i>            | pJB38-sfGFP-PBP2    |
| LAC-F <sub>Ch</sub> P3 <sub>GFP</sub> | pJB38-pbpC up-F<br>pbpC up-R     | LAC      | Upstream <i>pbpC</i>                                        | sfGFP-pbpC-F<br>sfGFP-pbpC-R         | pCM11    | sfGFP (with stop codon deleted and linker introduced)   | pbpC-F<br>pbpC-pJB38-R           | LAC      | <i>pbpC</i>            | pJB38-sfGFP-PBP3    |
| LAC-F <sub>Ch</sub> P4 <sub>GFP</sub> | pJB38-pbpD-F<br>pbpD-R           | LAC      | <i>pbpD</i> (with stop codon deleted and linker introduced) | pbpD-sfGFP-F<br>pbpD-sfGFP-R         | pCM11    | sfGFP                                                   | pbpD-down-F<br>pbpD-down-pJB38-R | LAC      | Downstream <i>pbpD</i> | pJB38-PBP4-sfGFP    |
| LAC-P2A <sub>Ch-1</sub>               | pJB38-mecA-C-F<br>mecA-C-R       | LAC      | <i>mecA</i> (with stop codon deleted and linker introduced) | mecA-C-mCherry-F<br>mecA-C-mCherry-R | pmCherry | mCherry                                                 | mecA-C-down-F<br>mecA-C-down-F   | LAC      | Downstream <i>mecA</i> | pJB38-PBP2a-mCherry |
| LAC-P2A <sub>Ch-2</sub>               | pJB38-mecA-N-up-F<br>mecA-N-up-R | LAC      | Upstream <i>mecA</i>                                        | mecA-N-mCherry-F<br>mecA-N-mCherry-R | pmCherry | mCherry (with stop codon deleted and linker introduced) | mecA-N-F<br>mecA-N-R             | LAC      | <i>mecA</i>            | pJB38-mCherry-PBP2a |

<sup>a</sup>The sequence of each oligonucleotide primer is listed in Table S4.

**TABLE S4** Oligonucleotide primers used in this study

| Primer           | Sequence (5' → 3')                                                   |
|------------------|----------------------------------------------------------------------|
| pJB38-pbpB up-F  | CGAGGCCCTTTCGTCTTCAACGTGTATGTTGTTATACGATG                            |
| pbpB up-R        | CTTTGCTCATTTCATACGCGGTCCTCACTTTC                                     |
| sfGFP-pbpB-F     | CCGCGTATGAATGAGCAAAGGAGAAGAAGAACTTTTC                                |
| sfGFP-pbpB-R     | TTTCCGTCATAGAACCTCCTCCACCAGAACCTCCTCCACCAC<br>TAGTGGATCCTTTGTAGAGCTC |
| pbpB-F           | AGGAGGTTCTATGACGGAAAACAAAGGATC                                       |
| pbpB-pJB38-R     | CAGAGCTTGCATGCCTGCAGTTAGTTGAATATACCTGTTAAT<br>CC                     |
| pJB38-F          | CTGCAGGCATGCAAGCTCT                                                  |
| pJB38-R          | TTGAAGACGAAAGGGCCTC                                                  |
| pJB38-pbpA up-F  | CGAGGCCCTTTCGTCTTCAACAGGTGTTCCAAGAATATG                              |
| pbpA up-R        | CTTTGCTCATTTTAATTTTTTTGCTTCGCC                                       |
| sfGFP-pbpA-F     | CAAAAAATTAAAATGAGCAAAGGAGAAGAAC                                      |
| sfGFP-pbpA-R     | AGAGCCACCTCCGCCAGAACCGCCACCTCCTTTGTAGAGCT<br>CATCCATG                |
| pbpA-F           | GTTCTGGCGGAGGTGGCTCTGCGAAGCAAAAAATTAAAATT<br>AAAAAAAATAAAATAG        |
| pbpA-pJB38-R     | CAGAGCTTGCATGCCTGCAGTTAGTCCGACTTATCCTTG                              |
| pbpC -pJB38-up-F | CGAGGCCCTTTCGTCTTCAAATGCTGCAGTAGAAGGTAC                              |
| pbpC up-R        | CTTTGCTCATAACTACCTACCTCTATTCAAAG                                     |
| sfGFP-pbpC-F     | GTAGGTAGTTATGAGCAAAGGAGAAGAAC                                        |
| sfGFP-pbpC-R     | AGAGCCACCTCCGCCAGAACCGCCACCTCCTTTGTAGAGCT<br>CATCCATG                |
| pbpC-F           | GTTCTGGCGGAGGTGGCTCTTTAAAAAGACTAAAAGAAAA<br>TCAAATG                  |
| pbpC-pJB38-R     | GATAAAAATAAAGACAAAGACAAATAACTGCAGGCATGCA<br>AGCTCTG                  |
| pJB38-pbpD-F     | CGAGGCCCTTTCGTCTTCAAATGAAAAATTTAATATCTATTA<br>TCATCATTTTATG          |
| pbpD-R           | GAGGCGCCGCAGGATTTTCTTTTCTAAATAAACGATTGATT<br>ATC                     |

|                   |                                                                     |
|-------------------|---------------------------------------------------------------------|
| pbpD-sfGFP-F      | GAAAAAGAAAATCCTGCGGCGCCTCCATGAGCAAAGGAGA<br>AGAAC                   |
| pbpD-sfGFP-R      | TTAGTATGTTTTATTTGTAGAGCTCATCCATG                                    |
| pbpD-down-F       | GCTCTACAAATAAAACATACTAAAAACGGACAAG                                  |
| pbpD-down-pJB38-R | CAGAGCTTGCATGCCTGCAGACAAGTAACGAAGAAGATTTT<br>AATAG                  |
| pJB38-mecA-C-F    | CGAGGCCCTTTCGTCTTCAAATGAAAAAGATAAAAATTGTT<br>CCAC                   |
| mecA-C-R          | AGAACCTCCTCCACCAGAACCTCCTCCACCACTAGTTTCATC<br>TATATCGTATTTTTTATTACC |
| mecA-C-mCherry-F  | ACTAGTGGTGGAGGAGGTTCTGGTGGAGGAGGTTCTATGGT<br>GAGCAAGGGCGAG          |
| mecA-C-mCherry-R  | CACTGTTTTGCTTGTACAGCTCGTCCATGC                                      |
| mecA-C-down-F     | GCTGTACAAGCAAAACAGTGAAGCAATC                                        |
| mecA-C-down-R     | CAGAGCTTGCATGCCTGCAGGAATTTAAATGTAGAATTAAA<br>AGGTATTAC              |
| pJB38-mecA-N-up-F | CGAGGCCCTTTCGTCTTCAAAGCTTCTTTAGCTGTTTC                              |
| mecA-N-up-R       | TGCTCACCATCAATATACTCCTTATATAAGACTACATTTG                            |
| mecA-N-mCherry-F  | GAGTATATTGATGGTGAGCAAGGGCGAG                                        |
| mecA-N-mCherry-R  | AGAACCTCCTCCACCAGAACCTCCTCCACCACTAGTGTACA<br>GCTCGTCCATGCC          |
| mecA-N-F          | ACTAGTGGTGGAGGAGGTTCTGGTGGAGGAGGTTCTATGAA<br>AAAGATAAAAATTGTTCCAC   |
| mecA-N-R          | CAGAGCTTGCATGCCTGCAGTTATTCATCTATATCGTATTTT<br>TTATTACC              |
| pbp2a-HiFi-F      | TTAAGAAGGAGATATACATATGTCAAAGATAAAGAAATT<br>AATAATACTATTGATG         |
| pbp2a-HiFi-R      | TCAGTGGTGGTGGTGGTGGTGGTTCATCTATATCGTATTTTTT<br>ATTACCG              |

---

## Supplemental Methods:

**Cloning, expression, and purification of *S. aureus* PBP2a (SaPBP2a).** The genomic DNA of MRSA LAC was extracted from an overnight culture using the DNeasy UltraClean Microbial Kit (Qiagen). The *mecA* gene was then PCR-amplified from the genomic DNA using Q5 High-Fidelity DNA polymerase (New England Biolabs) and the primers pbp2a-HiFi-F and pbp2a-HiFi-R (the sequences of which are listed in Table S4). These primers were designed to remove the N-terminal transmembrane domain and introduce a 6x His-tag at the C-terminus of the recombinant PBP2a protein. The expression vector pET-22b(+) (Novagen-EMD Chemicals) was linearized using the restriction enzymes *NdeI* and *XhoI*. The linearized plasmid and the amplified *mecA* gene were then combined, assembled, and circularized using the NEBuilder HiFi DNA Assembly Cloning Kit (New England Biolabs), with the resulting recombinant plasmid being used to transform *E. coli* NEB5- $\alpha$  cells. The transformed *E. coli* NEB5- $\alpha$  cells were grown on Luria-Bertani (LB) agar plates containing 100  $\mu$ g/mL ampicillin. Single colonies were selected for colony PCR to verify the presence of the proper insert in the pET-22b(+) plasmid. The recombinant plasmid was then isolated from *E. coli* NEB5- $\alpha$  and its sequence subsequently verified. This recombinant plasmid was then transformed into *E. coli* BL21 (DE3) cells, and the transformed cells were plated on LB agar containing 100  $\mu$ g/mL ampicillin.

A single colony of the transformed *E. coli* BL21 (DE3) cells was then isolated and grown overnight at 37 °C in 20 mL of ampicillin-containing LB broth. The overnight culture was diluted into 4 L of autoinduction terrific broth (3), followed by incubation at 37 °C for 6 hours. The cultures were then incubated for an additional 48 hours at 25 °C. The cells were then harvested by centrifugation at 5,000 x g for 15 minutes at 4 °C. The cell pellets were then resuspended in 50 mL of 10 mM sodium phosphate (pH 7.6), 250 mM NaCl, 1 mM phenylmethylsulfonyl fluoride

(PMSF), and 10% (vol/vol) glycerol and stored at -80 °C. Cells were lysed by ultrasonication for 15 minutes at 0 °C using a Qsonica Q500 sonicator equipped with a 1/2-inch probe, with an on/off cycle of 10 seconds and an amplitude set at 60%. The lysate was centrifuged at 10,000 x g for 30 minutes at 4 °C. The resulting supernatant was added to 5 mL of Talon metal affinity resin (Clontech Laboratories, Inc.) and shaken for 20 minutes at 4 °C. The resin was then washed with 50 mL of buffer containing 10 mM sodium phosphate (pH 7.6), 250 mM NaCl, and 10% (vol/vol) glycerol (buffer A) and packed into a gravity flow column. The column was washed with 10 mL of buffer A, followed by 25 mL of buffer containing 10 mM sodium phosphate (pH 7.6), 10 mM imidazole, and 250 mM NaCl (buffer B). The protein was then eluted using 15 mL of elution buffer containing 10 mM sodium phosphate (pH 7.6), 150 mM imidazole, and 250 mM NaCl (buffer C), and 500 µL fractions were collected. Each fraction was analyzed by SDS-PAGE and fractions containing protein were combined. The combined fractions were dialyzed overnight against 4 L of buffer containing 100 mM Tris-HCl (pH 7.4), 250 mM NaCl, and 10% (vol/vol) glycerol. The resulting dialysate was concentrated to a volume of 1 mL using Amicon Ultra 10K filters (EMD Millipore, Inc.). The final protein concentration was quantified using a Pierce BCA Protein Assay Kit (ThermoFisher).

## Supplemental References

1. Bose JL, Fey PD, Bayles KW. 2013. Genetic tools to enhance the study of gene function and regulation in *Staphylococcus aureus*. *Appl Environ Microbiol* 79:2218-24.
2. Lauderdale KJ, Malone CL, Boles BR, Morcuende J, Horswill AR. 2010. Biofilm dispersal of community-associated methicillin-resistant *Staphylococcus aureus* on orthopedic implant material. *J Orthop Res* 28:55-61.
3. Grabski A, Mehler M, Drott D. 2005. The Overnight Express Autoinduction System: High-density cell growth and protein expression while you sleep. *Nat Methods* 2:233-235.
